# Supplementary material for: Pediatric pan-central nervous system tumor analysis of immune-cell infiltration identifies correlates of antitumor immunity
Source: PubMed Central journal article supplement (PMC7455736; doi:10.1038/s41467-020-18070-y), 2020-08-28
Supplement: 41467_2020_18070_MOESM2_ESM.pdf [file 41467_2020_18070_MOESM2_ESM.pdf]

## **Descriptions of additional supplementary files**

### **Supplementary Data 1.**

**Description:** Statistical results for tests of association between estimates of immune cell infiltration and survival or other clinico-pathological data. Data is presented as 4 sheets in an excel workbook each labelled according to test cohort.

### **Supplementary Data 2.**

**Description:** Details of samples used to constitute test cohorts. Data is presented as 3 sheets in an excel workbook each labelled according to test cohort.
